# Supplementary material
Source: publisher site journal article supplement (https://www.dovepress.com/get_supplementary_file.php?f=238338.docx)
Supplement: Supplementary file 1 [file get_supplementary_file.php]

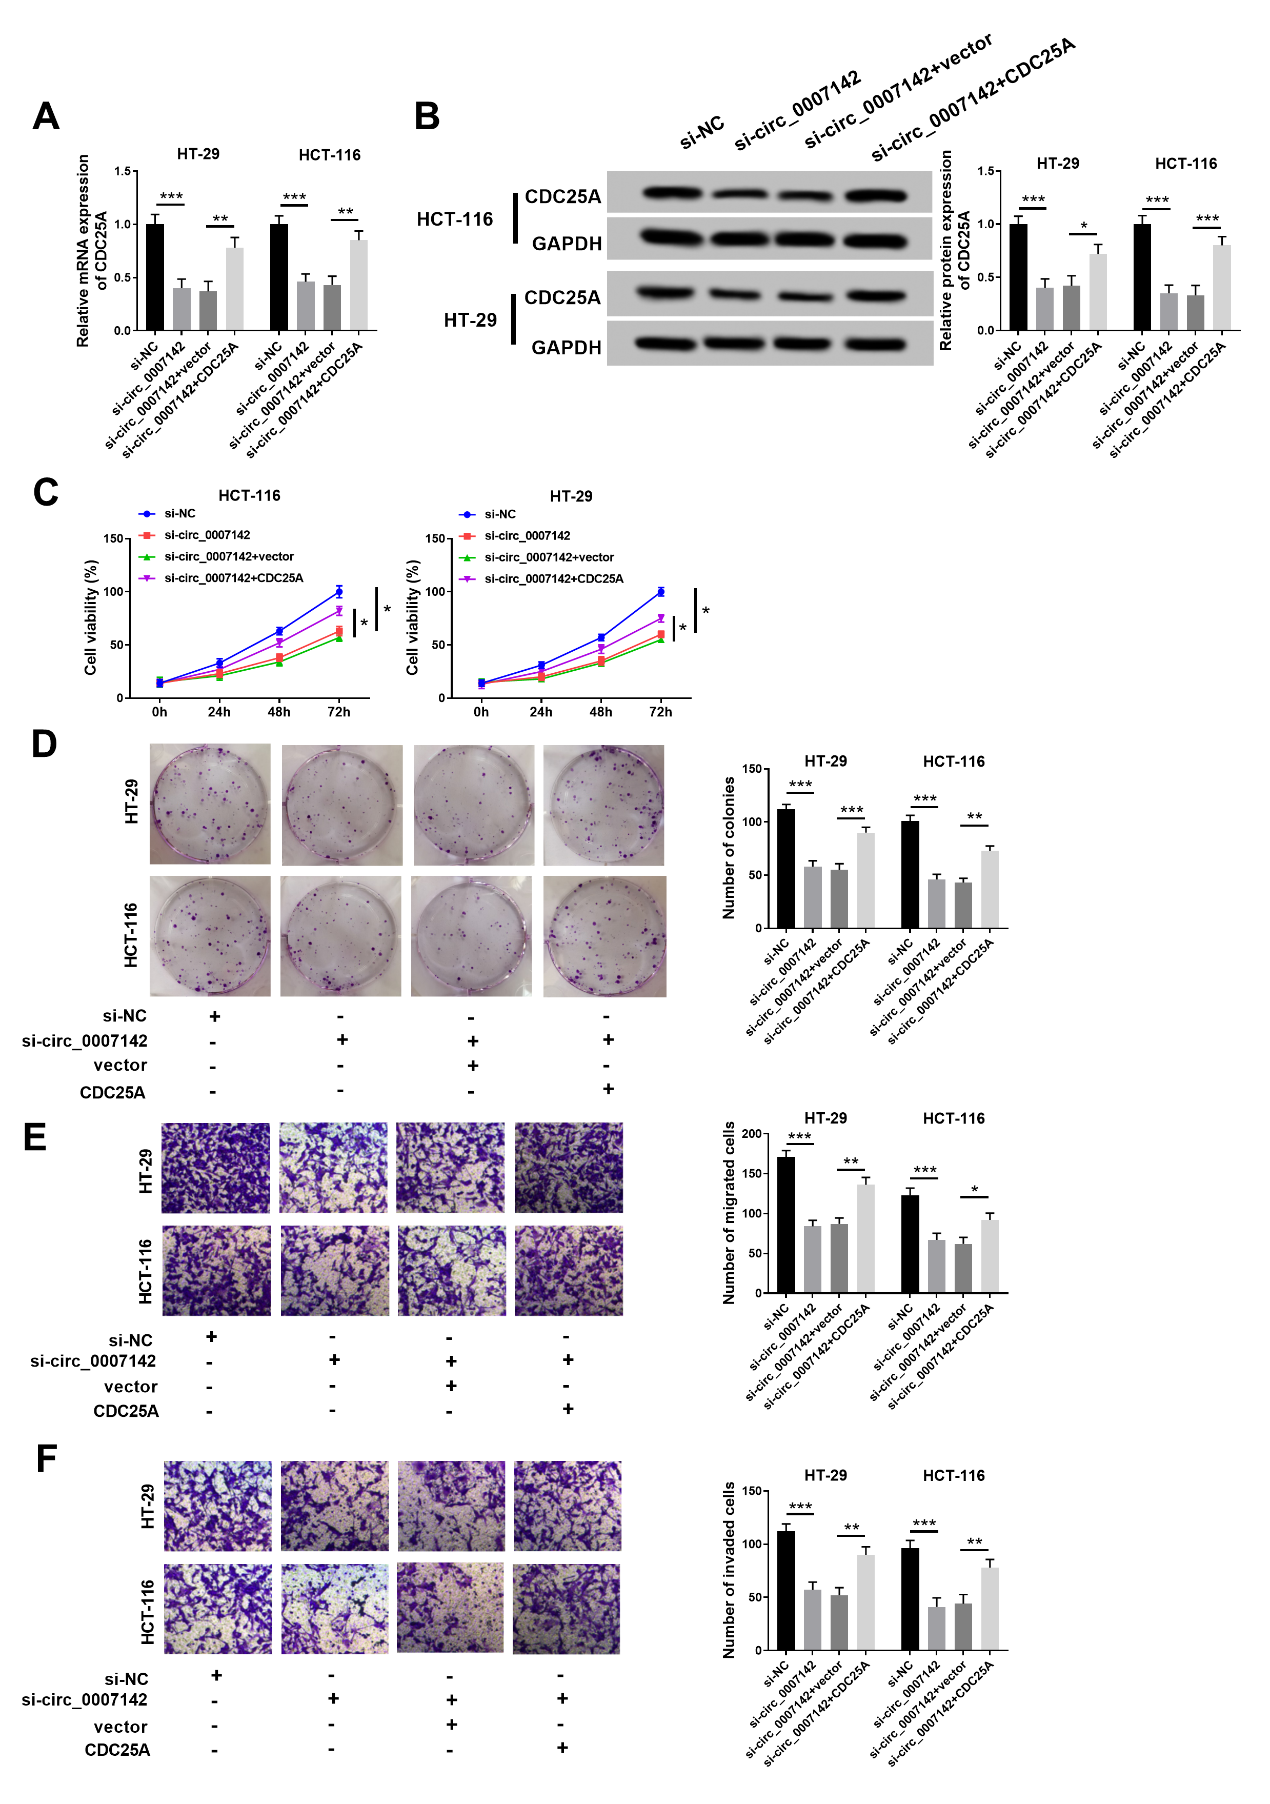


Fig. S1 CDC25A over-expression regained the inhibitory effects of circ_0007142 deficiency on cell proliferation, colony formation, migration, and invasion in CRC cells. (A-E) The HT-29 and HCT-116 cells were transfected with si-NC, si-circ_0007142, si-circ_0007142 + vector or si-circ_0007142 + CDC25A. (A) The mRNA level and protein level of CDC25A was examined by qRT-PCR and western blot assays. (C) The cell viability in transfected CRC cells was assessed by MTT assay. (D) The colony forming ability in transfected CRC cells was tested via colony formation assay. (E-F) The migrated and invaded abilities in transfected CRC cells were measured by Transwell assay. *P<0.05 **P<0.01, ***P<0.001.
